# Supplementary material for: Liposomal bupivacaine intercostal block placed under direct vision reduces morphine use in thoracic surgery
Source: PubMed Central journal article supplement — J Thorac Dis. 2024 Feb 23;16(2):1161–70. doi: 10.21037/jtd-23-1405 (PMC10944765; doi:10.21037/jtd-23-1405), 2024-02-23
Supplement: jtd-16-02-1161-supplementary.pdf [file jtd-16-02-1161-supplementary.pdf]

**Table S1** Clavien-Dindo classification

| Grade of complication | Definition                                                                                                  |
|-----------------------|-------------------------------------------------------------------------------------------------------------|
| I                     | Deviation from the normal postoperative course not requiring any intervention                               |
| II                    | Requiring pharmacologic treatment with drugs. Blood transfusion and total parenteral nutrition are included |
| III                   | Requires surgical, endoscopic or radiological intervention                                                  |
| IIIa                  | Without general anesthesia                                                                                  |
| IIIb                  | With general anesthesia                                                                                     |
| IV                    | Life-threatening complication requiring admission to intensive care unit                                    |
| IVa                   | Uniorgan dysfunction (including dialysis)                                                                   |
| IVb                   | Multiorgan dysfunction                                                                                      |
| V                     | Death                                                                                                       |
